# Supplementary material for: Impact of diurnal temperature fluctuations on larval settlement and growth of the reef coral Pocillopora damicornis
Source: Copernicus journal article supplement (doi:10.5194/bg-2017-120), 2017-05-08
Supplement: Supplementary file 1 [file bg-2017-120-supplement.pdf]

## Supplementary figures

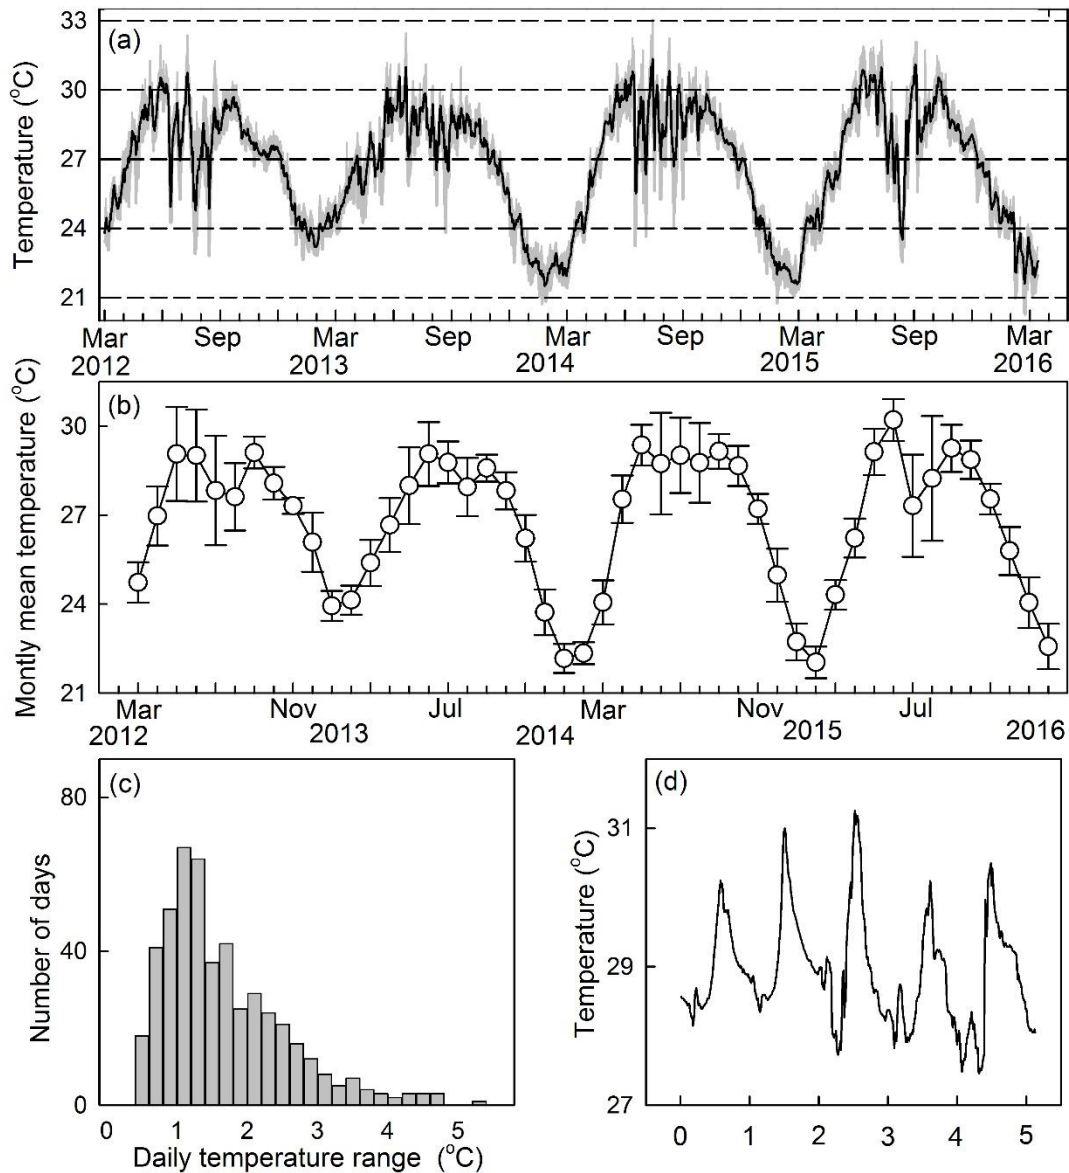

Fig S1. Temperature data at 3 m depth on Luihuitou fringing reef from 2012 to 2016.

(a) The bold black line shows the daily average temperatures, and the shaded grey area illustrates the daily maximum and minimum temperatures; (b) monthly mean ( $\pm$ SD) temperatures from 2012 to 2016; (c) histogram of daily temperature range in summer (June–September) from 2012 to 2015; (d) showing a period of 5 days of diurnal temperature fluctuations ( $\sim$ 3 °C) in June 2014.

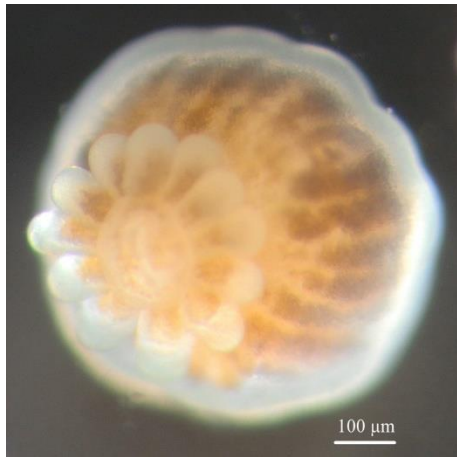

Fig S2. Metamorphosed and free drifting larvae of *Pocillopora damicornis* with extended tentacles.

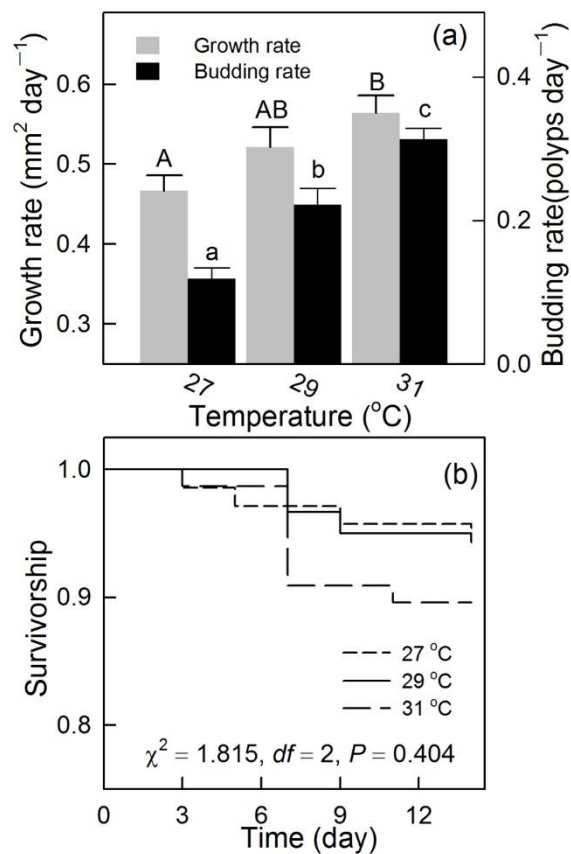

Fig S3. (a) Growth and (b) survival of *Pocillopora damicornis* recruits at 27, 29 and 31°C for two weeks. Lateral growth and budding rates were measured as described in Materials and methods. Growth was analyzed with one-way ANOVA followed by

Student-Newman-Keuls multiple comparisons (as indicated by letters). Survival curves were compared among treatments with Kaplan-Meier (KM) log-rank analysis.
