# Supplementary material for: Impact of diurnal temperature fluctuations on larval settlement and growth of the reef coral Pocillopora damicornis
Source: Copernicus journal article supplement (doi:10.5194/bg-2017-120), 2017-05-08
Supplement: Supplementary file [file bg-2017-120-AC2-supplement.pdf]

**Authors' response to reviewers' comments on the manuscript bg-2017-120  
"Impact of diurnal temperature fluctuations on larval settlement and growth of  
the reef coral *Pocillopora damicornis*" by Lei Jiang et al.**

**To the Editor**

Dear Dr. Christine Klaas,

We would express our sincerest gratitude for your help to correct some errors in the early version of this manuscript, and all the time and efforts it took to develop this manuscript and the review process. Furthermore, we appreciate the constructive comment from the two reviewers. We have carefully considered and incorporated the comments and suggestions from both reviewers, and the point-by-point responses are as follows. We are looking forward to receiving your response soon.

Best wishes,

Lei Jiang on behalf of all authors, [jjanglei12@mails.ucas.ac.cn](mailto:jjanglei12@mails.ucas.ac.cn)

**To Referee#1 Dr. D. Barshis**

**[General comments]** *The authors present a comprehensive assessment of the role of diurnally fluctuating temperatures on growth, settlement, and bleaching response of larvae from the coral *Pocillopora damicornis*. The study is quite sound and represents an important contribution to the field. Most coral thermal stress studies use static temperature exposures, hence a movement in the field to more realistic natural thermal profiles is desperately needed. Yet we still lack a fundamental understanding of the different responses of corals to static or variable temperatures in the same study. This research begins to fill in that gap and the manuscript is technically sound and well-presented. There are a few minor comments that should be addressed prior to publication as well as an additional reference that should be integrated into the discussion on growth (see line-by-line comments below). Also, while the writing is generally sound, there are a few instances of misuse of the word "the" and singular/plural errors that may be resolved by additional editing of the language. All in all, I think this is a sound paper that makes an important and needed contribution to the literature.*

**[Reply]** Thanks for the positive comments regarding our manuscript and other insightful and helpful suggestions. We will try our best to integrate all the constructive suggestions and further resolve the mistakes about the wording and singular/plural errors.

**Reply to specific line-by-line comments:**

**[Comment 1]** *Line 197. Siebeck found brightness and saturation to be indicative of bleaching, why was only saturation used?*

**[Reply]** Work by Siebeck *et al.*, 2006 suggested that for pictures of bleached *Pocillopora damicornis*, there were reduced saturation and elevated brightness values. Here, we measured the saturation and brightness values simultaneously and observed the reduction in saturation and increase in brightness (Fig S2). We only presented the saturation value to illustrate the paling of corals at elevated temperatures in the manuscript. We will further include the data on saturation and brightness in **Supplement (Fig. S2)**. Please refer to the Fig. S2 below for further details.

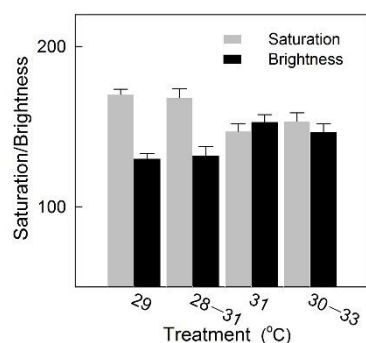

Fig. S2 Photographic metrics for *Pocillopora damicornis* recruits at different

temperature treatments.

*[Comment 2] Section 2.7 Please specify the software used for statistical tests and copies of code (as supplementary information) if possible.*

**[Reply]** All statistical analyses were performed with STATISTICA version 12.0 (Statsoft). This will be clarified in the text and **Supplement**.

*[Comment 3] Line 250-252. Confusing wording. Please clarify that both the elevated 31 °C stable and 30-33 °C fluctuating treatments induced bleaching while the control and 28-31 °C fluctuating treatments did not.*

**[Reply]** Revised as suggested. Now it reads “Compared to those in 29 °C, recruits at 31 °C showed a paler appearance as evidenced by the reduction in saturation and increase in brightness (Fig. S2). However, bleaching index which accounts for the difference in surface area of recruits, was unaffected by temperature level, regimes or their interaction (Fig. 3d)”. Please see **[Reply]** to **[Comment 4]** below for explanations and details.

*[Comment 4] Lines 327-332. Would add discussion of the increased growth and survival in the higher temps. They may have decreased in color saturation but were not "stressed" according to the other metrics. There could also be a confound wherein a faster growing colony might pale simply because it's growing faster than the Symbiodinium are dividing so it's not losing cells, just diluting pigment. The photographic technique here does not allow for analysis of cell loss and it's unclear over how much area saturation was measured (i.e. how many pixels) and whether it was normalized to surface area or polyp number to account for size differences.*

**[Reply]** The discussion of increased growth and survival at higher temperatures will be added as follows, “Although extrinsic mortality risk was minimized in the present laboratory study, recruits with increased growth rates at elevated temperatures had higher survivorship. This finding was congruent with the paradigm that mortality in early stages of reef corals was strongly dependent on colony size and growth rates (Hughes & Jackson 1985; Babcock & Mundy 1996)”.

After carefully examining our data, results totally supported the idea of the reviewer that coral recruits just became paling because of the faster growth. We are thankful to the reviewer for pointing out this puzzle and error. Generally, saturation and brightness of each recruit, were measured by taking the average value of 30 randomly placed quadrats (100×100 pixels each) on each coral picture using Photoshop’s histogram function (Siebeck et al., 2006). The quantification of bleaching rates in coral recruits was quite different from that was employed for adult branches in Siebeck et al., 2006. For adult branches, the mean saturation values can be taken as the proxy for symbiont density, however, for the new recruits here, only the saturation cannot totally reflect the symbiont content. The bleaching index should consider the change in total content

rather than the mean density, because all recruits came from a single coral larva and recruits had significantly different surface area after exposure to different temperature conditions. Therefore, to account for the size difference between different treatments, the total chlorophyll/symbiont content of each recruit was determined by multiplying the mean saturation by surface area (as measured in Section 2.6). Bleaching response can be further quantified as the reduction in chlorophyll/symbiont content of each recruit relative to the one yielding the maximum value. Since we got similar results from both saturation and brightness measurements, we only presented that results calculated from saturation in Fig. 3d.

Consequently, this would change our previous result about the bleaching response. In fact, recruits at 31 °C only exhibited a visible paling because of the faster growth rates and the resultant dilution of pigments, and there was no obvious bleaching either under elevated temperature or temperature fluctuations (Fig. 3d). We will amend this error in the whole manuscript.

#### References:

1. Babcock R, Mundy C. Coral recruitment: consequences of settlement choice for early growth and survivorship in two scleractinians. *J Exp Mar Biol Ecol* 206:179–201, 1996.
2. Hughes TP, Jackson JBC. Population dynamics and life histories of foliaceous corals. *Ecol Monogr* 55:141–66, 1985.
3. Siebeck, U., Marshall, N., Klüter, A., and Hoegh-Guldberg, O.: Monitoring coral bleaching using a colour reference card, *Coral Reefs*, 25, 453-460, 2006.

**[Comment 5]** Section 4.4 Please see Buddemeier et al 2008 A modeling tool to evaluate regional coral reef responses to changes in climate and ocean chemistry. *Limnology and Oceanography Methods*. Particularly their meta-analysis in Figure 2. An alternative explanation may simply be a decreasing slope of the temperature  $\times$  calcification relationship at higher temperatures as you approach the optimum (Buddemeier Fig. 2), wherein the corals are not calcifying linearly within the temperature fluctuation (i.e. at temperatures above the mean they're not growing much faster and they are growing slower at temperatures below the mean thus resulting in overall decreased calcification in comparison to 31 stable).

**[Reply]** Thanks for the suggestion on reference and the idea about the non-linear relationship between calcification and temperature. The response of coral skeletal growth to temperature is non-linear and characterized by a parabola whose apogee indicates an optimum and threshold, beyond which the stimulatory impact of temperature will be reversed (Buddemeier et al., 2008; Castillo et al., 2014; Pratchett et al., 2015). Therefore, although the optimal temperature for calcification by *P. damicornis* recruits remains unknown here, it is possible that in the fluctuating 31 °C, recruits may calcify at a slower rate when temperature was above 31 °C during daytime and below 31 °C during night, thus leading to an overall decrease in calcification compared to the constant 31 °C. We will include this alternative explanation in the text.

**Reference:**

1. Buddemeier R W, Jokiel P L, Zimmerman K M, et al. A modeling tool to evaluate regional coral reef responses to changes in climate and ocean chemistry [J]. *Limnology & Oceanography Methods*, 6(9):395-411, 2008.
2. Pratchett M S, Anderson K D, Hoogenboom M O, et al. Spatial, Temporal and Taxonomic Variation in Coral Growth-Implications for the Structure and Function of Coral Reef Ecosystems [J]. *Oceanography & Marine Biology*, 53:215-295, 2015.
3. Castillo K D, Ries J B, Bruno J F, et al. The reef-building coral *Siderastrea siderea* exhibits parabolic responses to ocean acidification and warming [J]. *Proceedings Biological Sciences*, 281(1797), 2014.

**To Referee#2 Dr. E. Rivest**

**General comments:** *In their manuscript titled “Impact of diurnal temperature fluctuations on larval settlement and growth of the reef coral Pocillopora damicornis,” the authors present research on an exciting and timely topic – the effect of temperature variability on thermotolerance of two life history stages of a common reef-building coral. The topic is within the scope of the journal and the focus on effects of environmental variability is still novel within the coral field. Unfortunately, I find that this paper is not suitable for publication in its present form. There are several general ways in which this manuscript can be improved.*

**[Reply]** We are deeply grateful for the supreme and considerable efforts of the reviewer to give these valuable and helpful comments. We carefully considered the suggestions and corrections, and made the structure clearer and text more evident to the broad readership of Biogeosciences.

**Reply to specific line-by-line comments:**

**[Comment 1]** *The Introduction should include a description of the study species and of their reproduction (brooding) and the fact that the larvae contain symbionts upon release. These are critical pieces of information that the general readership of Biogeosciences will likely not know and are important for properly interpreting the results.*

**[Reply]** Thanks for the suggestion about providing the basic information about the reproductive biology and vertical transmission mode in this coral species. These facts will be added in Introduction. “*P. damicornis* is a widely distributed and major reef-building coral on reef flats in the Indo-Pacific region (Veron 1986). This species planulates almost every month and the release of free-swimming and zooxanthellate planula larvae follows a lunar cycle (Fan et al., 2002)”

References:

1. Veron, J.E.N.. Corals of Australia and the Indo-Pacific. University of Hawaii Press, Honolulu 644 pp, 1986.
2. Fan TY, Li JJ, Ie SX, Fang LS. Lunar periodicity of larval release by pocilloporid corals in southern Taiwan. Zool Stud 41:288–294, 2002

**[Comment 2]** *The Methods needs a much better overall description of the experimental design. It is difficult to tell if the spat were from the same or separate trials. Furthermore, the experimental design is flawed because it does not include replication of the treatments and the culturing techniques are not shown to avoid imposing artifacts on the responses of the corals.*

**[Reply]** Sorry for the confusion about the origin of coral spats in Methods. We have revised to make it clear about the two separate experiments. For the settlement assays,

larvae were introduced to the petri-dishes with seawater and a CCA chip to test the effects of temperature treatments on larval settlement. Furthermore, another batch of larvae were transferred to petri-dishes and allowed to settle within 20 hours. Afterwards, these newly settled recruits were randomly assigned to treatment tanks to investigate the temperature effects on the early survival and growth of recruits. These important details will be included in the text.

It was a pity that the experimental design did not include replication and we have explicitly pointed out that limitation and problem in Methods. This problem was addressed by dispensing of larvae/recruits with randomization procedures and controlling other confounding factors such as salinity and light intensity which are of great importance to coral growth (Inoue et al., 2012; Dufault et al., 2013). Secondly, dishes were rotated daily to avoid the potential positional effects within each tank system. All these procedures were performed to ensure similar conditions across treatments except for temperatures during the experiment. Therefore, any differences in the observed responses were due to treatments (Hurlbert 1984; Underwood 1997). Furthermore, this issue was also addressed by carefully examining the significance level of the treatment effects to make sure they were real (All the statistical results will be presented as Tables in Supplement).

#### References:

1. Dufault A M, Ninokawa A, Bramanti L, et al. The role of light in mediating the effects of ocean acidification on coral calcification [J]. *Journal of Experimental Biology*, 2013, 216(9):1570-7.
2. Inoue M, Shinmen K, Kawahata H, et al. Estimate of calcification responses to thermal and freshening stresses based on culture experiments with symbiotic and aposymbiotic primary polyps of a coral, *Acropora digitifera* [J]. *Global & Planetary Change*, 2012, 92-93(s 92–93):1-7.
3. Hurlbert S H. Pseudoreplication and the Design of Ecological Field Experiments [J]. *Ecological Monographs*, 1984, 54(2):187-211.
4. Underwood AJ. *Experiments in ecology: Their logical design and interpretation using analysis of variance*. Cambridge University Press, 1997.

**[Comment 3]** *The statistical tests and results need to be fully described. Posthoc analyses are not described. Table(s) with full results of all statistical models should be included, including results of posthoc analyses*

**[Reply]** In fact, the statistical results of *post-hoc* analyses have been displayed in the figures and in the text. In Line 235-238, Line 245-246, Line 250-252, Line 259-260 and Line 267-269, results of *post-hoc* analyses of settlement, budding, lateral growth and calcification were described. For instance, when describing the different effects temperature fluctuations on larval settlement and calcification at different mean temperatures, we were just depicting results from the post-hoc analyses. The detailed information of the *post-hoc* analyses will be included as Tables in **Supplement**.

**[Comment 4]** *More synthesis and integrative discussion is needed across all the responses measured to inform a broader picture of the implications for the ecology of this coral. The authors need to place their results in the broader context of biogeosciences and coral reef ecology.*

**[Reply]** Thanks for the suggestion about an integrative and broader discussion. To do that, we changed the title of “Conclusions” to “Conclusions and implications”, and added a new paragraph after conclusions as follows: “Results of this study suggested that coral larvae subjected to diurnal temperature variations, especially at elevated temperatures, exhibited better settlement competence than those at static thermal treatment. The fluctuating temperatures were favorable for the photo-physiology of endosymbionts and did not put much extra stress on the post-settlement development of coral recruits. Therefore, for corals in highly fluctuating environments, they may have the potential to tolerate and acclimate to the changing seawater temperatures. These findings may also provide clues as to how diverse coral communities can persist and thrive in some thermally variable conditions (Craig et al., 2002; Richards et al., 2015). Furthermore, it is important to note that this study was technically limited to the set of one fluctuating amplitude, and the extent of thermal variance has as much of an impact on fitness as the changes in mean temperature (Vasseur et al. 2014). Given that by now there is still no consensus in the future temperature variability (Burroughs 2007), it will be critical to study the impact of broad ranges of thermal variations which corals may fare in a warming ocean”

References:

1. Craig P, Birkeland C, Belliveau S. High temperatures tolerated by a diverse assemblage of shallow-water corals in American Samoa [J]. *Coral Reefs*, 20(2):185-189, 2001.
2. Richards Z T, Garcia R A, Wallace C C, et al. A Diverse Assemblage of Reef Corals Thriving in a Dynamic Intertidal Reef Setting (Bonaparte Archipelago, Kimberley, Australia) [J]. *PLoS ONE*, 10(2):e0117791, 2015.
3. Burroughs WJ (2007) *Climate change: a multidisciplinary approach*. Cambridge University Press
4. Vasseur DA, DeLong JP, Gilbert B, Greig HS, Harley CDG, McCann KS, Savage V, Tunney TD, O'Connor MI. Increased temperature variation poses a greater risk to species than climate warming. *Proceedings of the Royal Society B: Biological Sciences* 281, 2014.

**[Comment 5]** L58-59 – “sea surface temperature have increased on average by 0.7 deg C” ...since what date? A frame of reference is needed here.

**[Reply]** Revised as suggested. Now it reads, “Sea surface temperatures have increased on average by 0.7 °C since preindustrial times (Feely et al., 2009)”.

Reference:



Feely R, Orr J, Fabry V, Kleypas J, Sabine C, Langdon C. Present and future changes in seawater chemistry due to ocean acidification. In: McPherson B, Sundquist E (eds) Carbon sequestration and its role in the global carbon cycle. Geophys Monogr Ser, Vol 183. AGU, p 175–188, 2009.

*[Comment 6] L65-70 – it would be good to cite studies that have quantitatively analyzed temperature variability for coral reefs here like Rivest and Gouhier, 2015 and Guadayol et al. 2014*

**[Reply]** Thanks for the suggestion on references. References will be included.

References:

1. Rivest E B, Gouhier T C. Correction: Complex environmental forcing across the biogeographical range of coral populations[J]. PLoS ONE, 10(3): e0121742, 2015.
2. Òscar Guadayol, Silbiger N J, Donahue M J, et al. Patterns in Temporal Variability of Temperature, Oxygen and pH along an Environmental Gradient in a Coral Reef[J]. PLoS ONE, 9(1): e85213, 2014.

*[Comment 7] L77-79 – actually, there are a handful of studies (at least 7) that have looked at the effects of temperature variability. I do see that the authors have described the results of a few of these studies in the next paragraph, but they should rephrase this sentence to better define the knowledge gap that their study aims to fill.*

**[Reply]** We have revised this sentence as suggested. Now it reads, “However, only a handful of studies have explored this thermodynamic effect on corals which routinely experience thermal oscillations in nature (e.g., Mayfield et al., 2012; Putnam et al., 2010)”

*[Comment 8] L83 – “more suited” is vague and confusing. Please be more specific here.*

**[Reply]** In Longman Dictionary of Contemporary English, “suit” means “be acceptable, suitable or convenient for a particular person or in a particular situation”. Therefore, we thought this word choice was proper.

*[Comment 9] L84 – “deleterious effects” of what? Diel temperature oscillations?*

**[Reply]** Revised as suggested. Now it reads, “Evidence for the deleterious effects of diel temperature oscillations include the significant reductions in photochemical efficiency, symbiont density and aerobic respiration”.

*[Comment 10] L86 – “under diel temperature oscillations” compared to what?*

**[Reply]** We added the information as suggested. Now it reads, “under diel temperature

oscillations in comparison to that in constant temperatures”.

**[Comment 11]** L90-93 – this statement needs references.

**[Reply]** References will be added as required.

References:

1. Byrne M. Global change ecotoxicology: Identification of early life history bottlenecks in marine invertebrates, variable species responses and variable experimental approaches [J]. *Marine Environmental Research*, 2012, 76(2):3-15.
2. Keshavmurthy S, Fontana S, Mezaki T, et al. Doors are closing on early development in corals facing climate change [J]. *Scientific Reports*, 2014, 4:5633.

**[Comment 12]** L126 – *the date of collection of adult corals and the holding conditions of the corals prior to larval release need to be included. The temperature of the water at which the larvae were released should be included.*

**[Reply]** We will include information on date of collection and holding conditions. “Eight *P. damicornis* colonies were collected from 3 m depth on Luhuitou fringing reef on 20 August 2015. Colonies were transported to Tropical Marine Biological Research Station, and placed individually into 20 L flow-through tanks under partially shaded light conditions (noon irradiance,  $\sim 300 \mu\text{mol photons m}^{-2} \text{s}^{-1}$ ) and ambient temperature ( $28.7 \pm 0.5^\circ\text{C}$ ). The outflow of each tank was passed through a cup fitted with 180  $\mu\text{m}$  mesh on the bottom to trap larvae”

**[Comment 13]** L129 – *“the recruit experiment” – is this the settlement or post-settlement experiment? This should be more clearly defined using a phrase like “to test the effects of xx on yy, larvae were transferred”. This is confusing to the reader because the authors have not defined what settlers or recruits are. Remember – the audience is general and interdisciplinary. Or perhaps it would be clearer to describe more generally that the larvae and settlers are being tested in completely separate experiments?*

**[Reply]** Thanks for the suggestion. We revised the title of this Section as “Collection and allocation of coral larvae”, and this paragraph as well to clearly define the settlement and recruit experiments as follows “Larvae released from these colonies were collected at 07:00 on 22 August 2015, pooled and haphazardly assigned for the following experiments. For the settlement assays, larvae were transferred to 5.5-cm diameter plastic petri dishes as described below (see Section 2.4). To further test the effects of temperature treatments on the photo-physiology and growth of recruits, another batch of larvae were transferred to 10-cm-diameter petri dishes which were left floating in a flow-through tank. Twenty hours later, 4 dishes with a total of 35–40 newly settled recruits were assigned to each treatment tank. Only recruits that settled individually and at least 1 cm apart from others were selected for the experiment to

avoid possible contact between recruits through growth.”

**[Comment 14]** L130 – *were the dishes covered? Did the authors account for/measure effects of evaporation on salinity? Did the authors measure the temperature in the floating dishes during this time? Was there selection that could have influenced the performance of the spat? Again, “spat” is another new synonym used. Please choose one term for the juvenile corals, define it clearly for the reader, and use it consistently throughout the text.*

**[Reply]** All the dishes were covered with close-fitting lids to minimize evaporation while submerged in the tanks. Unfortunately, we did not measure the salinity of seawater within the dish after incubation. Preliminary measurements showed that the temperature difference in seawater temperature between dishes and tanks was less than 0.4 °C and this information will be included in the text. The selection of recruits that were at least 1 cm apart from others was designed to make sure that they will not come into contact through lateral growth. Thanks for the suggestion of the wording for juvenile corals. We will use “recruits” consistently throughout the text.

**[Comment 15]** L135 – *“ambient temperature” where? At the collection site of the adult corals?*

**[Reply]** We revised this sentence to make it clear. Now it reads, “The 29 °C treatment, corresponding to the ambient temperature at the collection site of adult *P. damicornis*, was taken to represent the control treatment.”

**[Comment 16]** L153-155 – *these are results and should be moved to that section.*

**[Reply]** We moved the information about the temperatures in each treatment to a new section “Treatment conditions” in Results.

**[Comment 17]** L155 – *how was salinity checked?*

**[Reply]** “Salinity within each tank was measured using an Orion 013010MD conductivity probe twice a day”.

**[Comment 18]** L159-162 – *these are results and should be moved to that section.*

**[Reply]** Information about the light conditions was moved to a new section “Treatment conditions” in Results as suggested.

**[Comment 19]** L162 – *it is a significant limitation that the experiment has no true replication. I understand and empathize with the frustrations of facility and logistical constraints but more justification is needed for the validity of the results. Could the authors repeat the experiment to replicate the results in place of replication during the experiment?*

**[Reply]** We are sorry for this limitation and we have explicitly stated this problem in Methods. To try to eliminate other confounding effects, we randomly allocated coral recruits to each treatment and accurately controlled the salinity and light intensity between treatments. Furthermore, the dishes with recruits were rotated daily within each tank to minimize the potential positional effects. In fact, during the pilot study (as the results presented in Supplement), we failed to manipulate the fluctuating temperature treatments because of a technical problem, and therefore we only reported results of the constant temperature treatments in Supplement. The results of the pilot study were consistent with the later one on the aspect that the growth and development of *P. damicornis* recruits were accelerated at 31 °C, therefore further consolidating our results.

**[Comment 20]** L166 – the title “Settlement assay” makes me think that the authors are going to be testing effects on settlement and is confusing with “preparation of spat” in the title of the last section. Please revise.

**[Reply]** We changed the structure in Methods and revised the title as suggested to make them clearer and easier to understand. Please see **[Reply]** to **[Comment 2]** and **[Comment 13]**.

**[Comment 21]** L168 – is this species of CCA a natural settlement substrate for this species in your location? Please provide additional details here.

**[Reply]** It has been shown that *P. damicornis* larvae have no specific discrimination for the settlement substrate and it can settle on plastic sheet without the presence of CCA (Hidaka 1985; Lei Jiang personal observation). *Hydrolithon reinboldii* is one of the most abundant CCA species in our study site and juvenile *P. damicornis* in the field are often found adjacent to *H. reinboldii* in our location. Our previous observation found that it was an effective settlement cue for *P. damicornis* larvae. These details will be included in the text.

Reference:

Hidaka M. Tissue compatibility between colonies and between newly settled larvae of *Pocillopora damicornis* [J]. Coral Reefs, 1985, 4(2):111-116.

**[Comment 22]** L170 – did the dishes have lids? Were they sealed in the treatment tank (“submerged”)? What was the depth of the water in the dishes? It seems like a very high spat density in a small volume of water. Please provide justification that these are natural and representative settlement conditions for this species.

**[Reply]** Yes, the petri dishes were covered with lids as they were submerged in the tanks. The depth of the water in each dish was approximately 7 mm. The volume of a single *P. damicornis* larvae ranged from 0.35-0.39 mm<sup>3</sup> (Isomura & Nishihira 2001;

Edmunds et al., 2011), and the total volume of 15 larvae was approximately 5.3-5.8 mm<sup>3</sup>, which only accounted for 0.04% of the total seawater volume (15 ml, 15,000 mm<sup>3</sup>) in each dish. Furthermore, the larval density in the petri dishes here was 1 larvae per ml, which is representative of that in the literature (e.g., Heyward & Negri 2010; Putnam et al., 2008; Da-Anoy et al., 2017; Harii et al., 2010; Negri et al., 2005).

#### References:

1. Heyward A J, Negri A P. Plasticity of larval pre-competency in response to temperature: observations on multiple broadcast spawning coral species [J]. *Coral Reefs*, 2010, 29(3):631-636.
2. Putnam H M, Edmunds P J, Fan T Y. Effect of Temperature on the Settlement Choice and Photophysiology of Larvae From the Reef Coral *Stylophora pistillata* [J]. *Biological Bulletin*, 2008, 215(2):135-142.
3. Da-Anoy J P, Villanueva R D, Cabaitan P C, et al. Effects of coral extracts on survivorship, swimming behavior, and settlement of *Pocillopora damicornis*, larvae [J]. *Journal of Experimental Marine Biology & Ecology*, 2017, 486:93-97.
4. Harii S, Yamamoto M, Hoegh-Guldberg O. The relative contribution of dinoflagellate photosynthesis and stored lipids to the survivorship of symbiotic larvae of the reef-building corals [J]. *Marine Biology*, 2010, 157(6):1215-1224.
5. Isomura N, Nishihira M. Size variation of planulae and its effect on the lifetime of planulae in three Pocilloporid corals [J]. *Coral Reefs*, 2001, 20(3):309-315.
6. Edmunds P J, Cumbo V, Fan T Y. Effects of temperature on the respiration of brooded larvae from tropical reef corals [J]. *Journal of Experimental Biology*, 2011, 214(16):2783-90.
7. Negri A, Vollhardt C, Humphrey C, et al. Effects of the herbicide diuron on the early life history stages of coral [J]. *Marine Pollution Bulletin*, 2005, 51(1):370-383.

**[Comment 23]** L180 – where did these spat come from? Were they from the “settlement assay” or from “preparation of spat”? Were they kept in the four treatments during this time? I can’t interpret the results of these tests without knowing these important details.

**[Reply]** Sorry again for this structure problem and the confusion it caused. The larvae were randomly used for two separate experiments. Recruits for the post-settlement experiment were all from another batch of larvae which settled on 10-cm-diameter petri-dishes. Also refer to **[Reply]** to **[Comment 2]**, **[Comment 13]** and **[Comment 20]**.

**[Comment 24]** L194-195 – describe the settings for photography and illumination to allow others to replicate your measurements.

**[Reply]** ISO setting of the camera was 12800 and the illumination provided while photographing was 35  $\mu\text{mol photons m}^{-2} \text{s}^{-1}$ . This information will be added in the text.

**[Comment 25]** L198 – the statistical comparison needs to be described here. What were

*the controls? Was the bleaching index assessed as relative to corals in the control treatment or was it a comparison of absolute values?*

**[Reply]** Saturation of each coral, a good proxy for chlorophyll/symbiont density (Siebeck et al. 2006), was measured by taking the average value of 30 randomly placed quadrats (100×100 pixels each) on each coral picture using Photoshop’s histogram function. The total chlorophyll/symbiont content of each recruit was determined by multiplying the mean saturation by surface area (as measured in Section 2.6 below) to further account for the size difference. Bleaching response was quantified as the reduction in chlorophyll/symbiont content of each recruit relative to the one yielding the maximum value. Therefore, it was just a comparison of the relative values.

Reference:

Siebeck, U., Marshall, N., Klüter, A., and Hoegh-Guldberg, O.: Monitoring coral bleaching using a colour reference card, *Coral Reefs*, 25, 453-460, 2006.

**[Comment 26]** L201 – *which recruits? The ones assessed for bleaching? Different ones?*

**[Reply]** We are sorry for the unclear structure of Methods that made the reviewer feel confused. All the recruits in each treatment were checked daily for their survivorship. At the end of the experiment, recruits were also photographed to assess their surface area and bleaching response. They were the same batch throughout the recruit experiment. To make it clearer, we revised this sentence as “Throughout the recruit experiment, corals from each treatment were checked daily under a dissecting microscope and scored as alive or dead based on the presence of polyp tissue”. Also refer to **[Reply]** to **[Comment 2]**, **[Comment 13]**, **[Comment 20]** and **[Comment 23]**.

**[Comment 27]** L213 – *details of post-hoc analyses need to be included.*

**[Reply]** When main effects were significant ( $P < 0.05$ ), planned multiple comparisons following ANOVAs were conducted using Fisher’s LSD test (Day and Quinn, 1989). All the details of *post-hoc* analyses will be included in **Supplement**.

Reference:

Day, R. W., and Quinn, G. P.: Comparisons of treatments after an analysis of variance in ecology, *Ecol Monogr*, 59, 433-463, 1989.

**[Comment 28]** L229-230 – *is this ‘normal’ settlement behavior for this species? Could it be an artifact of the ‘unnatural’ settlement conditions?*

**[Reply]** It remains enigmatic whether it was “normal” settlement behavior or it was just an artifact of the “unnatural” settlement conditions. This phenomenon has been confirmed in a wide range of coral species in laboratory (Edmunds et al., 2001; Putnam et al., 2008; Vermeij, 2009; Mizrahi et al., 2014; Richmond, 1985; Denis et al., 2014).

In the discussion part, we presented the possible ecological implications of this kind of larvae according to previous studies (Mizrahi et al., 2014; Richmond, 1985).

References:

1. Edmunds, P., Gates, R., and Gleason, D.: The biology of larvae from the reef coral *Porites astreoides*, and their response to temperature disturbances, *Mar. Biol.*, 139, 981-989, 2001.
2. Putnam H M, Edmunds P J, Fan T Y. Effect of Temperature on the Settlement Choice and Photophysiology of Larvae From the Reef Coral *Stylophora pistillata* [J]. *Biological Bulletin*, 215(2):135-142, 2008.
3. Vermeij, M. J. A.: Floating corallites: a new ecophenotype in scleractinian corals, *Coral Reefs*, 28, 987, 2009.
4. Mizrahi, D., Navarrete, S. A., and Flores, A. A. V.: Groups travel further: pelagic metamorphosis and polyp clustering allow higher dispersal potential in sun coral propagules, *Coral Reefs*, 33, 443-448, 2014.
5. Richmond, R. H.: Reversible metamorphosis in coral planula larvae, *Mar. Ecol. Prog. Ser.*, 22, 181-185, 1985.
6. Denis V, Loubeyres M, Doo S S, et al. Can benthic algae mediate larval behavior and settlement of the coral *Acropora muricata*? [J]. *Coral Reefs*, 33(2):431-440, 2014.

**[Comment 29]** L231-235 – since the results were not significant, there are no “distinct” differences. If the interaction is not significant, how can there be significant groupings stated on the figure (2c)?

**[Reply]** It is certain that “despite a non-significant ANOVA *F*-test there are, in fact, significant differences between at least one set of means among the treatment groups tested which can be ultimately resolved using multiple comparison tests that have more power than the original ANOVA” (Underwood 1997; Dunne 2010; Lesser 2010). Therefore, even if the interaction term was not significant ( $P < 0.05$ ), it did not exclude the possibility of significant groupings. Since the main effect of temperature on settlement was significant, the *post-hoc* analyses did show that the effects of temperature fluctuation were dependent on the mean temperature.

References:

1. Underwood AJ (1997) *Experiments in ecology*. Cambridge University Press, United Kingdom
2. Dunne R P. Synergy or antagonism—interactions between stressors on coral reefs [J]. *Coral Reefs*, 2010, 29(1):145-152.
3. Lesser M P. Interactions between stressors on coral reefs: analytical approaches, re-analysis of old data, and different conclusions [J]. *Coral Reefs*, 2010, 29(3):615-619.

**[Comment 30]** L237 – “greatly alleviated” is an interpretation and does not belong in

*the Results section. The phrase “in contrast” is inappropriate here because settlement success was not statistically distinct with that under the fluctuating and constant regimes at 29degC.*

**[Reply]** Revised as suggested in Line 237. About the phrase “in contrast”, we thought it was appropriate. It was evident that the temperature fluctuations had different effect on settlement at different mean temperature levels. “Settlement was similar between fluctuating and constant regimes at 29 °C”. However, it was not this case at 31 °C. Hence, we used “in contrast” to make a comparison of the effects temperature fluctuations at 29 and 31 °C.

**[Comment 31]** L241 – *what were the separate analyses?*

**[Reply]** Separate analyses meant separation of the results by timepoint, i.e., we analyzed the data separately for each timepoint. We revised this sentence as “Separation of the results by time showed that.....”

**[Comment 32]** L255 – *replace “strongly” with “significantly.” Also, the Chi-square test was not listed in the Results section. Please include.*

**[Reply]** The wording is changed as suggested. Moreover, the Chi-square test on the budding state among different treatments was included in Section 2.7 Data analyses in Methods. “Recruits were categorized into 3 states according to the number of polyps: 1-polyp, (2-4)-polyp and (5-6)-polyp. A Chi-square test was used to compare the difference in bud formation among treatments”

**[Comment 33]** L264-267 – *again how can the authors claim this if the model was not statistically significant?*

**[Reply]** Again, the reason was that the main effect of temperature was significant, and the temperature fluctuations had different effects on calcification at different mean temperatures as revealed by the *post-hoc* analyses. Please see the explanation in **[Reply]** to **[Comment 29]**.

**[Comment 34]** L270 – *survival of what?*

**[Reply]** Revised as suggested. Survival of recruits remained >86% in all treatments after 7 days.

**[Comment 35]** L275 – *this is the first time Q10 is mentioned. This needs to be included in the methods and defined carefully for the broad readership. Why was Q10 calculated for these results and not the others?*

**[Reply]** Thanks for the suggestion. The definition, calculation formula and the



implications of temperature coefficient Q10 will be added in Methods. Q10 is widely used in temperature experiments to express the sensitivity of metabolism, development and growth to temperature changes (Hochachka & Somero 2002; Rivest & Hofmann 2014; Howe & Marshall 2001). Q10 was calculated using following equation:  $Q10 = (R2/R1)^{10/(T2-T1)}$ , where R is the growth rate at temperature T2 or T1. Q10 values of enzyme-catalyzed reactions often double for the 10 °C increase in temperature. As Q10 is often calculated for respiration, growth and development, here it was calculated for changes in lateral growth, bud development and calcification at two temperatures.

#### Reference

1. Hochachka, P. W., and Somero, G. N.: Biochemical Adaptation: Mechanism and Process in Physiological Evolution, Oxford University Press, New York, 2002.
2. Rivest E B, Hofmann G E. Responses of the Metabolism of the Larvae of *Pocillopora damicornis* to Ocean Acidification and Warming[J]. PLoS ONE, 2014, 9(4): e96172.
3. Howe, S. A. and A. T. Marshall. Thermal compensation of metabolism in the temperate coral, *Plesiastrea versipora* (Lamarck, 1816). J. Exp. Mar. Biol. Ecol. 259: 231–248, 2001.

**[Comment 36]** L279 –*Based on my interpretation of the data, it was only lower at constant elevated temperatures.*

**[Reply]** Revised as suggested. Now it reads “The pronounced decline in successful settlement at constant 31 °C”

**[Comment 37]** L282 – *“hardly impaired” – too qualitative*

**[Reply]** Revised as suggested. Now it reads, “Interestingly, the transient exposure to 33 °C in variable conditions did not produce the same negative response in larval settlement as the exposure to constant 31 °C; on the contrary, settlement in fluctuating 31 °C was comparable to that in the control treatment”.

**[Comment 38]** L283 – *I am having difficulty with the phrase “greatly attenuated the thermal stress on settlement” throughout the manuscript (alleviated, mitigated, tempered....). Because of the lack of replication, it is hard to attribute the responses to thermal stress and constant vs. variable conditions. I think it would be better to say something like “did not produce the same negative response to high temperature as under exposure to constant high temperature.” Based on the experimental design, it is impossible to know whether the corals simply experienced less thermal stress overall because they spent some time at temperatures less than 31degC each day or if they responded differently to the high temperature. These mechanistic possibilities should be discussed and phrasing should be more careful.*

**[Reply]** Sorry for this confusion. We have revised the saying in Line 282-283 as

suggested. Please see **[Reply]** to **[Comment 37]**. About the replication problem, please see **[Reply]** to **[Comment 2]** for explanations and details.

For the word choice of “mitigated, alleviated, tempered.....”, we should explain them one by one. For the first one in Line 32, since  $Q_m$  was lowered by temperature fluctuations, we revised it as “reduced the maximum excitation pressure”. In Line 236-237, we did agree with the reviewer’s comment that this was an interpretation and should be stated as facts. Therefore, we revised this sentence as “settlement rates at 31 °C differed significantly among temperature regimes, with settlement being significantly higher at fluctuating conditions and comparable to that in control”. For that in Line 282-283, we have revised following the reviewer’s suggestion. Please see **[Reply]** to **[Comment 37]**. For the one in Line 312, as stated before, there was a significant effect of temperature fluctuation on  $Q_m$ , and we revised it as “temperature oscillations could relieve the heat stress on corals”. For that in Line 423-424, we used the word “tempered” to state that the thermal stress caused by elevated mean temperature (31 °C) on larval settlement was lessened by temperature fluctuations. This was consistent with the meaning of “temper” as “to make something less severe or extreme”,

Although, in the fluctuating treatment, corals spent some time at temperatures less than 31 °C each day compared to those in constant 31 °C, that did not mean they experienced less thermal stress overall. Because the experiment was designed to create similar mean temperature values between constant and fluctuating temperature treatments. When determining thermal stress, there must be a reference level. Therefore, relative to control (29 °C in this study), the cumulative thermal stress, as assessed by degree heating days (Maynard et al., 2008), was equivalent for constant and fluctuating 31 °C treatments (corresponding to ~ 2 degree-heating day in the settlement assay). This index is useful in characterizing the experimental heating treatments and facilitating the comparison between temperature treatments (Oliver & Palumbi et al., 2011; Schoepf et al., 2015).

Moreover, we would like to thank the reviewer for the hint that larvae may respond differently to high temperatures. Previous studies have shown that short-term exposure (minutes to hours) of coral larvae to extremely high temperatures (33-37 °C) would enhance the subsequent settlement at lower temperature, suggesting a strong latent effect (Coles 1985; Nozawa & Harrison, 2007). Therefore, another nonexclusive reason for the higher settlement in fluctuating 31 °C may be the 2-h exposure at 33 °C during daytime, thereby exerting a latent effect on settlement at night when the temperature was lowered. This possibility will be added to the Discussion.

#### References:

1. Maynard, J. A. et al. ReefTemp: An interactive monitoring system for coral bleaching using high-resolution SST and improved stress predictors. *Geophys. Res. Lett.* 35, L05603, 2008.
2. Schoepf, V., Stat, M., Falter, J. L., and McCulloch, M. T.: Limits to the thermal tolerance of corals adapted to a highly fluctuating, naturally extreme temperature environment. *Sci. Rep.*, 5, 17639, 2015.

3. Oliver, T. A., and Palumbi, S. R.: Do fluctuating temperature environments elevate coral thermal tolerance?. *Coral Reefs*, 30, 429-440, , 2011
4. Coles SL. The effects of elevated temperature on reef coral planula settlement as related to power station entrainment. In: *Proceedings of 5th international coral reef congress*. 4:171–176, 1985.
5. Nozawa Y, Harrison P L. Effects of elevated temperature on larval settlement and post-settlement survival in scleractinian corals, *Acropora solitaryensis*, and *Favites chinensis* [J]. *Marine Biology*, 152(5):1181-1185, 2007.

**[Comment 39]** L288 – *I don't think the authors can say that fluctuating conditions favor settlement because the 29degC constant and fluctuating conditions produced statistically similar settlement rates. Furthermore, when did settlement happen? Did it happen during the daytime when temperatures were higher, or during the nighttime when temperatures were lower? These details could be important for appropriate interpretation of the results.*

**[Reply]** We totally agreed with the reviewer since fluctuating conditions did not impact settlement at 29 °C. However, settlement rates at the mean temperature of 31 °C differed between constant and fluctuating regimes. To address this, we revised this sentence to make it more specific. Now it reads, “whereas settlement may proceed as temperature descends to a more tolerable level at night (30 °C in this study). It is likely that the fluctuating temperature conditions may provide some respite for coral larvae, thereby favoring the settlement at elevated and fluctuating temperatures”. For the purpose of not disturbing larvae while handling of petri dishes, we did not monitor settlement at multiple timepoints during incubation. Therefore, we added more discussion here to state this problem and further observations are clearly needed to confirm this hypothesis. The added discussion is as follows, “The use of small petri dishes in the settlement assays restricted the frequent check of larval conditions in order not to disturb larvae. Future studies are needed to regularly observe and establish the dynamics of larval behavior under fluctuating temperatures to confirm this hypothesis”.

**[Comment 40]** L298-301 – *what about the desperate larval hypothesis?*

**[Reply]** The desperate larval hypothesis denotes that the non-feeding planktonic larvae become less discriminating in their selection of settlement substrate, i.e., more desperate to settle, as they age and energy reserves run low. The settlement assays only lasted 24 hours, and therefore the desperate larval hypothesis may not fit here.

**[Comment 41]** L327 – *both constant and fluctuating T treatments*

**[Reply]** The +2 °C treatment denoted both the constant and fluctuating 31 °C treatments.

**[Comment 42]** L340-342 – *this sentence needs to be better integrated with the paragraph*

**[Reply]** Thanks for this suggestion and we have revised this paragraph as follows: “Unlike previous work showing the susceptibility of endosymbionts within coral recruits to elevated temperatures (Anlauf et al., 2011; Inoue et al., 2012), there was no significant symbiont loss, i.e., bleaching, for juvenile *P. damicornis* in +2 °C treatments. The resistance of endosymbionts to thermal stress may be linked with the algal type in our study site. *P. damicornis* predominantly harbored *Symbiodinium* clade D in Luhuitou (Zhou 2011), which have been found to be particularly heat resistant (Baker et al., 2004). Further, daytime exposure to high temperatures in fluctuating treatments did not induce the bleaching of juvenile *P. damicornis*. This observation is in stark contrast to that of Putnam and Edmunds (2011) for adult corals. That study found that ephemeral exposure to 30 °C at noon in fluctuating conditions (26–30 °C) elicited a 45% reduction in symbiont density of adult *P. meandrina* compared to those in steady 28 °C, an effect size larger than that arising from continuous exposure to 30 °C (36%). For juvenile corals, the flat structure has been suggested to provide a higher mass transfer capacity to remove reactive oxygen species than the branching and three-dimensional adults (Loya et al., 2001). Hence, the discrepancy between our results and that of Putnam and Edmunds (2011) may, at least partially, be due to the morphology-specific difference in thermal tolerance in corals”.

References:

1. Loya, Y., Sakai, K., Yamazato, K., Nakano, Y., Sambali, H., and van Woesik, R.: Coral bleaching: the 538 winners and the losers, *Ecol. Lett.*, 4, 122-131, 2001.
2. Putnam, H. M., and Edmunds, P. J.: The physiological response of reef corals to diel fluctuations in 570 seawater temperature, *J. Exp. Mar. Biol. Ecol.*, 396, 216-223, 2011.
3. Zhou, G.W. Study on diversity of *Symbiodinium* and flexibility in scleractinian coral-algal symbiosis. Ph.D. thesis, Graduate School of Chinese Academy of Sciences, p 127.
4. Baker A C, Starger C J, Mcclanahan T R, et al. Coral reefs: corals' adaptive response to climate change [J]. *Nature*, 430(7001):741, 2004.

**[Comment 43]** L344 – *this section does not mesh well with the rest of the Discussion*

**[Reply]** In fact, section 4.3 was all about the higher growth rate and accelerated development at 31 °C compared to 29 °C, which was an important and independent aspect of this study.

**[Comment 44]** L407-410 – *but calcification rates increased under the high temperature treatments.....?*

**[Reply]** Here we are only discussing about the possible explanation for the 20% reduction in calcification at fluctuating 31 °C relative to its constant counterpart. It did

not contradict the fact that recruits calcified faster at higher temperatures.

**[Comment 45]** L429 – *but it was still elevated compared to the 29degC treatments... Figure S1. Panels a and b are not very relevant displays of temperature information for useful interpretation of the experimental design. A plot showing average seasonal daily temperature variability would be more useful. Plot d needs to have an x-axis label.*

**[Reply]** To make it clearer, now it reads “two hours’ exposure to 33 °C in fluctuating 31 ° during daytime apparently caused a reduction in calcification compare to that in the constant 31 °C”. For Fig S1., S1a did display the seasonal daily average temperatures and daily maximum and minimum values. The bold black line in Fig. s1a shows the daily average temperatures, and the shaded grey area illustrates the daily maximum and minimum temperatures Therefore, it did show the information about the seasonal daily temperature variability. The x-axial label “Date” for S1d was added.

**[Comment 46]** L116 – *Doesn’t the dataset go to 2016, not 2015?*

**[Reply]** Change was made as suggested in the text. Now it reads “Seawater temperatures at 3 m depth on Luhuitou fringing reef (18°12’N, 109°28’E) was recorded at 30 min intervals from 2012 to 2016.”

**[Comment 47]** L123 – *Should Fig. S1d be cited here instead of S1c?*

**[Reply]** Sorry for this mistake and correction was made accordingly in the text.

**[Comment 48]** *There are consistent errors in grammar and word choice throughout the manuscript. While it does not impede the reader from understanding the scientific content, I advise the authors to carefully copy edit the entire text.*

**[Reply]** We are truly sorry for this problem. With the help of the Editor and all authors, we have tried our best to correct errors in grammar and wording. We will further check the errors and improve the wording. After careful revision, it will be further sent for English editing service.
